# Supplementary material for: Agricultural Water Management Using Two-Stage Channels: Performance and Policy Recommendations Based on Northern European Experiences
Source: MDPI journal article supplement (doi:10.3390/su13169349), 2021-08-20
Supplement: s1 [file s1]

Archive with 1 entries (1 files):
- sustainability-1290300-supplementary material.pdf
