# Supplementary material for: Agricultural Water Management Using Two-Stage Channels: Performance and Policy Recommendations Based on Northern European Experiences
Source: MDPI journal article supplement (doi:10.3390/su13169349), 2021-08-20
Supplement: s1 [file s1 › sustainability-1290300-supplementary material.pdf]

## S1 Description of study sites

Table S1 compiles information on the pilot study sites. The primary reach-scale pilot site, Ritobäcken catchment (Figure S1), represents Finnish clay-silt agricultural areas, with surface or sub-surface drained agricultural fields comprising 11.7% of the 10.3 km<sup>2</sup> catchment area. The remaining non-agricultural catchment is comprised of forests and heaths, partly drained by open ditches, and rock (80.5%); constructed area (4.9%); water areas (2.9%); and wetlands and fens (0.1%; Figure S2). According to the watershed-scale WSFS-VEMALA model operationally run by the Finnish Environment Institute for the main Finnish watersheds [88], 70% of the SS and 65% of the total P loads at Ritobäcken originate from the agriculture (excluding natural background load) while natural background load from forested areas generates 27% of SS and 20% of P loads. The dispersed settlements with 150 residents are estimated to generate 0% of SS and 10% of TP loads while the households are required to have an efficient wastewater treatment system. The dominant superficial deposits in the catchment are clays. The non-agricultural areas are mainly covered by rocky ground covered by a less than one metre thick soil layer. The soil type is Leptosol.

The mean annual precipitation is approximately 630 mm/a and the mean annual temperature +6 °C, as derived from records of Finnish Meteorological Institute for Harabacka, Porvoo, located at a 20 km distance in a similar geographical area. Due to the permeable soils and low rain intensities, sub-surface runoff is the dominant runoff type in the area, and only small amounts of surface runoff have been observed [13]. The annual minimum and mean discharges are ~0.001 m<sup>3</sup>/s and 0.12 m<sup>3</sup>/s, respectively, while the highest observed discharge during the 2.5-year monitoring period was 1.5 m<sup>3</sup>/s [23]. The two-stage channel has a total width of 10 m and additional 3 m wide buffer strips, and a bottom slope of 0.001-0.002.

*Table S1. Description of pilot-scale two-stage channel (TSC) study sites.*

| Name of channel   | Location of catchment outlet/downstream end of TSC | Catchment size (km <sup>2</sup> ) | TSC length (m)   | Construction year | Soil type               | Type of site for the present paper   |
|-------------------|----------------------------------------------------|-----------------------------------|------------------|-------------------|-------------------------|--------------------------------------|
| Ritobäcken        | 60.334687 N, 25.220518 E                           | 10.3                              | 820              | 2010              | Clay, silt              | Primary reach-scale pilot site       |
| Kaukanaronoja     | 61.093819 N 22.339602 E                            | 5,8                               | 700              | 2017              | Silt, fine sand         | Supplementary reach-scale pilot site |
| Luvalahdenoja     | 61.097941 N, 22.210012 E                           | NA                                | 440              | 2020              | Clay, fine-grained till | Supplementary reach-scale pilot site |
| Hardombäcken      | 60.518634 N, 26.137433 E                           | 4                                 | 300              | 2017              | Clay                    | Supplementary reach-scale pilot site |
| Uuhikonoja        | 60.763729 N, 23.709928 E                           | 6                                 | 2 340            | 2020              | Clay, sandy till, peat  | Supplementary reach-scale pilot site |
| Leppioja          | 64.803001 N, 25.562390 E                           | 40                                | 1 000            | 2012              | Fine sand, peat         | Supplementary reach-scale pilot site |
| River Perniönjoki | 60.144804 N, 23.127418 E                           | 255                               | 14 800 (assumed) | NA                | Clay, sandy till        | Catchment-scale pilot site           |

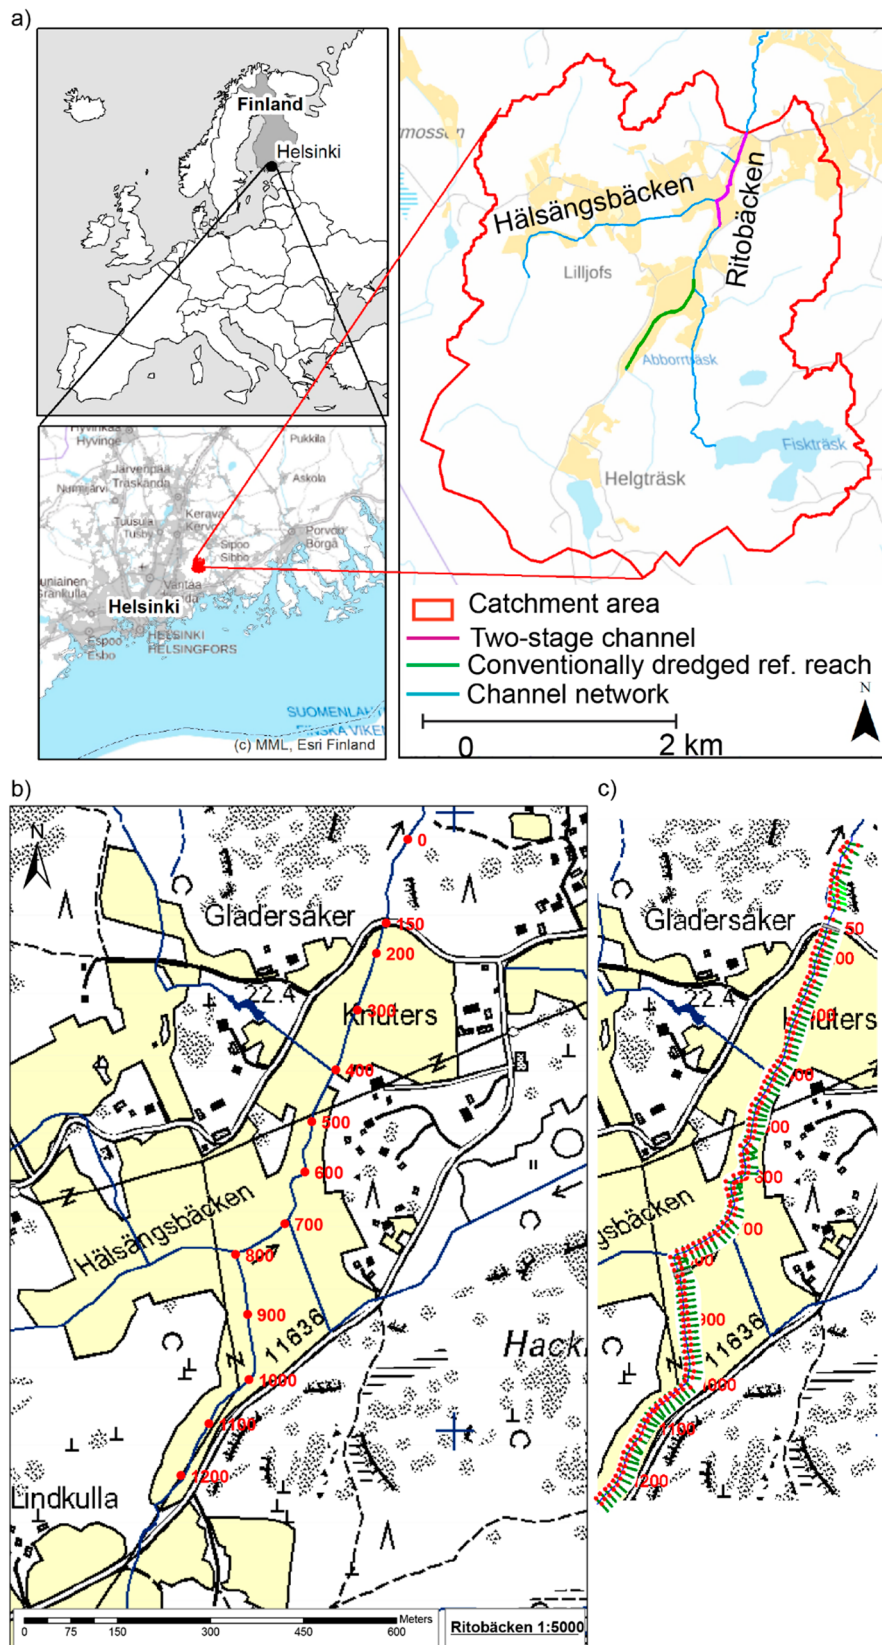

Figure S1 The Ritobäcken catchment area with the two-stage channel and conventionally dredged reference reaches; agricultural land use is indicated in yellow (a). A more detailed map showing the surroundings of the 820 m long two-stage channel located at chainage (main channel distance) 150 m - 970 m (b, the chainage shown in red numbers). The schematization in HEC-RAS shows the included cross-sections in green and the overbank stations with red (c).

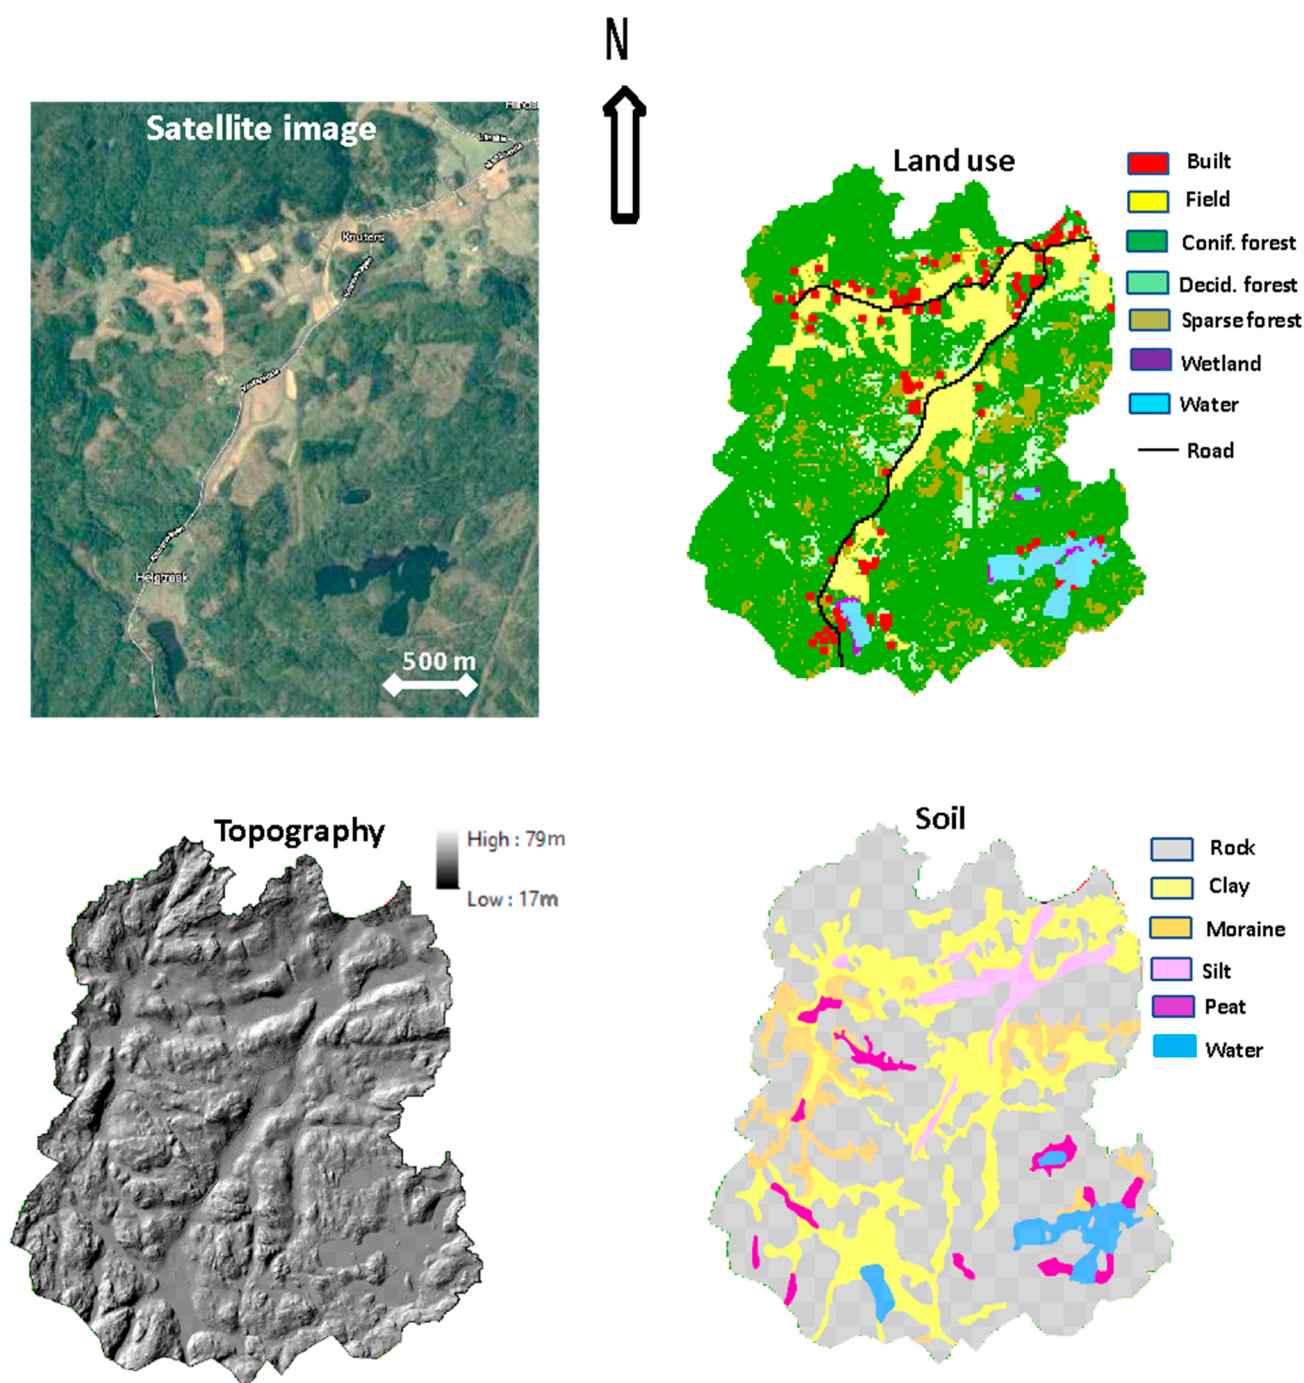

Figure S2. Aerial view, land use, topography and soil types at the primary reach-scale pilot site (Ritobäcken, Finland). Source: GIS database of Finnish Environment Institute.

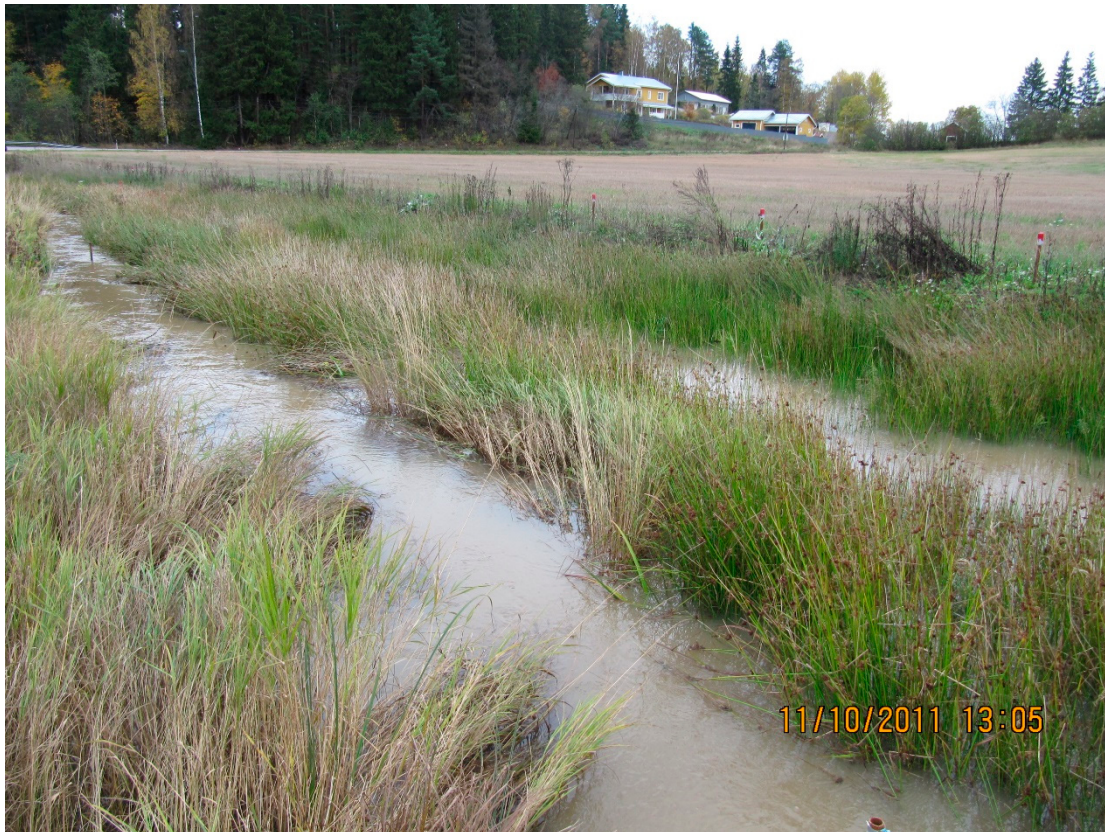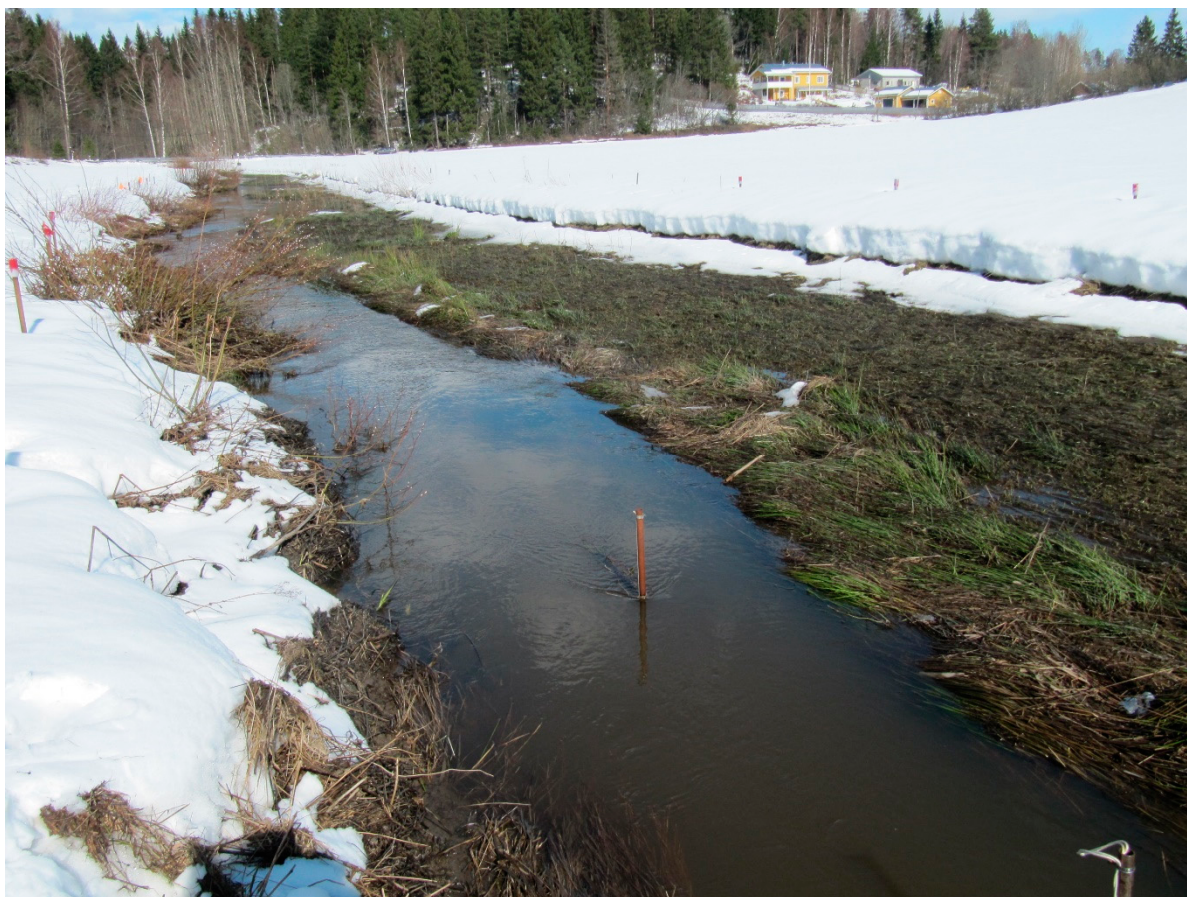

Figure S3 The reach-scale pilot site during autumn (top) and spring snowmelt (bottom) conditions.

## S2 Cross-sectional data (original source: [23])

Cross-section 6

| Distance from right bank (m) | Elevation, year 2010 (m) | Elevation, year 2012 (m) |
|------------------------------|--------------------------|--------------------------|
| 0.265                        | NA                       | 17.340                   |
| 0.465                        | 17.302                   | 17.325                   |
| 0.665                        | 17.251                   | 17.274                   |
| 0.865                        | 17.197                   | 17.209                   |
| 1.065                        | 17.113                   | 17.125                   |
| 1.265                        | 17.049                   | 17.062                   |
| 1.465                        | 16.978                   | 16.953                   |
| 1.665                        | 16.893                   | 16.869                   |
| 1.865                        | 16.802                   | 16.796                   |
| 2.065                        | 16.746                   | 16.736                   |
| 2.265                        | 16.650                   | 16.681                   |
| 2.465                        | 16.633                   | 16.679                   |
| 2.665                        | 16.641                   | 16.686                   |
| 3.065                        | 16.667                   | 16.670                   |
| 3.465                        | 16.653                   | 16.666                   |
| 3.865                        | 16.662                   | 16.654                   |
| 4.265                        | 16.642                   | 16.644                   |
| 4.665                        | 16.657                   | 16.659                   |
| 5.065                        | 16.645                   | 16.655                   |
| 5.465                        | 16.653                   | 16.665                   |
| 5.865                        | 16.632                   | 16.644                   |
| 6.265                        | 16.634                   | 16.651                   |
| 6.665                        | 16.593                   | 16.597                   |
| 7.065                        | 16.522                   | 16.500                   |
| 7.265                        | 16.443                   | 16.481                   |
| 7.465                        | 16.441                   | 16.450                   |
| 7.665                        | 16.484                   | 16.419                   |
| 7.865                        | 16.324                   | 16.276                   |
| 8.065                        | 16.155                   | 16.140                   |
| 8.265                        | 16.128                   | 16.144                   |
| 8.465                        | 16.140                   | 16.135                   |
| 8.665                        | 16.136                   | 16.127                   |
| 8.865                        | 16.191                   | 16.207                   |
| 9.065                        | 16.243                   | 16.314                   |
| 9.265                        | 16.318                   | NA                       |
| 9.465                        | 16.593                   | 16.756                   |
| 9.665                        | 16.846                   | NA                       |
| 9.865                        | 16.885                   | 16.890                   |
| 10.065                       | 16.945                   | NA                       |

Cross-section 7

| Distance from right bank (m) | Elevation, year 2010 (m) | Elevation, year 2012 (m) |
|------------------------------|--------------------------|--------------------------|
| 0.465                        | 17.334                   | 17.350                   |
| 0.665                        | 17.298                   | 17.307                   |
| 0.865                        | 17.225                   | 17.240                   |
| 1.065                        | 17.180                   | 17.172                   |
| 1.265                        | 17.105                   | 17.102                   |
| 1.465                        | 17.032                   | 17.024                   |
| 1.665                        | 16.951                   | 16.919                   |
| 1.865                        | 16.876                   | 16.790                   |
| 2.065                        | 16.786                   | 16.757                   |
| 2.265                        | 16.725                   | 16.775                   |
| 2.465                        | 16.669                   | 16.720                   |
| 2.865                        | 16.673                   | 16.672                   |
| 3.265                        | 16.662                   | 16.688                   |
| 3.665                        | 16.672                   | 16.676                   |
| 4.065                        | 16.652                   | 16.668                   |
| 4.465                        | 16.645                   | 16.653                   |
| 4.865                        | 16.643                   | 16.650                   |
| 5.265                        | 16.669                   | 16.673                   |
| 5.665                        | 16.645                   | 16.642                   |
| 6.065                        | 16.628                   | 16.632                   |
| 6.465                        | 16.576                   | 16.604                   |
| 6.665                        | 16.562                   | 16.595                   |
| 6.865                        | 16.545                   | 16.558                   |
| 7.065                        | 16.480                   | 16.511                   |
| 7.265                        | 16.417                   | 16.399                   |
| 7.465                        | 16.222                   | 16.125                   |
| 7.665                        | 16.177                   | 16.103                   |
| 7.865                        | 16.182                   | 16.097                   |
| 8.065                        | 16.156                   | 16.118                   |
| 8.265                        | 16.204                   | 16.180                   |
| 8.465                        | 16.247                   | 16.289                   |
| 8.665                        | 16.361                   | 16.375                   |
| 8.865                        | 16.448                   | NA                       |
| 9.065                        | 16.507                   | 16.523                   |
| 9.265                        | 16.476                   | NA                       |
| 9.465                        | 16.494                   | 16.551                   |
| 9.665                        | 16.615                   | NA                       |
| 9.865                        | 16.668                   | 16.693                   |
| 10.065                       | 16.748                   | NA                       |
| 10.265                       | 16.760                   | 16.781                   |

Cross-section 14

| Distance from right bank(m) | Elevation, year 2010 (m) | Elevation, year 2012 (m) |
|-----------------------------|--------------------------|--------------------------|
| 0.465                       | 17.084                   | 17.087                   |
| 0.665                       | 17.027                   | 17.041                   |
| 0.865                       | 16.957                   | 16.943                   |
| 1.065                       | 16.874                   | 16.823                   |
| 1.265                       | 16.800                   | 16.729                   |
| 1.465                       | 16.722                   | 16.683                   |
| 1.665                       | 16.622                   | 16.676                   |
| 1.865                       | 16.547                   | 16.575                   |
| 2.065                       | 16.454                   | 16.489                   |
| 2.265                       | 16.423                   | 16.452                   |
| 2.665                       | 16.423                   | 16.460                   |
| 3.065                       | 16.445                   | 16.476                   |
| 3.465                       | 16.443                   | 16.475                   |
| 3.865                       | 16.438                   | 16.468                   |
| 4.265                       | 16.458                   | 16.485                   |
| 4.665                       | 16.427                   | 16.464                   |
| 5.065                       | 16.438                   | 16.430                   |
| 5.465                       | 16.408                   | 16.453                   |
| 5.865                       | 16.425                   | 16.483                   |
| 6.265                       | 16.422                   | 16.462                   |
| 6.465                       | 16.421                   | 16.457                   |
| 6.665                       | 16.375                   | 16.398                   |
| 6.865                       | 16.334                   | 16.319                   |
| 7.065                       | 16.195                   | 16.236                   |
| 7.265                       | 16.070                   | 15.944                   |
| 7.465                       | 15.962                   | 15.844                   |
| 7.665                       | 15.832                   | 15.796                   |
| 7.865                       | 15.796                   | 15.793                   |
| 8.065                       | 15.804                   | 15.844                   |
| 8.265                       | 15.835                   | 15.852                   |
| 8.465                       | 16.136                   | 15.880                   |
| 8.665                       | 16.522                   | 16.449                   |
| 8.865                       | 16.562                   | NA                       |
| 9.065                       | 16.582                   | 16.599                   |
| 9.265                       | 16.717                   | NA                       |
| 9.465                       | 16.767                   | 16.757                   |
| 9.665                       | 16.781                   | NA                       |
| 9.865                       | 16.786                   | 16.799                   |
| 10.065                      | 16.822                   | NA                       |
| 10.265                      | 16.830                   | 16.844                   |

Cross-section 15

| Distance from right bank(m) | Elevation, year 2010 (m) | Elevation, year 2012 (m) |
|-----------------------------|--------------------------|--------------------------|
| 0.265                       | NA                       | 17.072                   |
| 0.465                       | 17.068                   | 17.066                   |
| 0.665                       | 17.009                   | 17.014                   |
| 0.865                       | 16.936                   | 16.929                   |
| 1.065                       | 16.852                   | 16.789                   |
| 1.265                       | 16.776                   | 16.700                   |
| 1.465                       | 16.702                   | 16.692                   |
| 1.665                       | 16.612                   | 16.686                   |
| 1.865                       | 16.537                   | 16.669                   |
| 2.065                       | 16.470                   | 16.581                   |
| 2.265                       | 16.440                   | 16.449                   |
| 2.665                       | 16.418                   | 16.428                   |
| 3.065                       | 16.422                   | 16.420                   |
| 3.465                       | 16.425                   | 16.425                   |
| 3.865                       | 16.444                   | 16.459                   |
| 4.265                       | 16.457                   | 16.469                   |
| 4.665                       | 16.453                   | 16.448                   |
| 5.065                       | 16.430                   | 16.425                   |
| 5.465                       | 16.409                   | 16.427                   |
| 5.865                       | 16.394                   | 16.417                   |
| 6.265                       | 16.404                   | 16.418                   |
| 6.665                       | 16.424                   | 16.451                   |
| 6.865                       | 16.422                   | 16.435                   |
| 7.065                       | 16.429                   | 16.395                   |
| 7.265                       | 16.316                   | 16.348                   |
| 7.465                       | 16.229                   | 16.185                   |
| 7.665                       | 16.061                   | 15.953                   |
| 7.865                       | 16.016                   | 15.863                   |
| 8.065                       | 15.989                   | 15.865                   |
| 8.265                       | 15.965                   | 15.848                   |
| 8.465                       | 15.989                   | 15.872                   |
| 8.665                       | 16.002                   | 15.938                   |
| 8.865                       | 16.466                   | 16.401                   |
| 9.065                       | 16.549                   | NA                       |
| 9.265                       | 16.541                   | 16.500                   |
| 9.465                       | 16.611                   | NA                       |
| 9.665                       | 16.665                   | 16.681                   |
| 9.865                       | 16.741                   | NA                       |
| 10.065                      | 16.873                   | 16.908                   |
| 10.265                      | 16.959                   | NA                       |

Cross-section 18

| Distance from right bank (m) | Elevation, year 2010 (m) | Elevation, year 2012 (m) |
|------------------------------|--------------------------|--------------------------|
| 0.265                        | 17.026                   | 17.035                   |
| 0.465                        | 17.025                   | 17.026                   |
| 0.665                        | 16.963                   | 16.981                   |
| 0.865                        | 16.894                   | 16.902                   |
| 1.065                        | 16.831                   | 16.825                   |
| 1.265                        | 16.756                   | 16.736                   |
| 1.465                        | 16.679                   | 16.708                   |
| 1.665                        | 16.620                   | 16.653                   |
| 1.865                        | 16.555                   | 16.577                   |
| 2.065                        | 16.480                   | 16.478                   |
| 2.265                        | 16.409                   | 16.408                   |
| 2.465                        | 16.359                   | 16.369                   |
| 2.665                        | 16.344                   | 16.345                   |
| 3.065                        | 16.338                   | 16.340                   |
| 3.465                        | 16.328                   | 16.344                   |
| 3.865                        | 16.359                   | 16.376                   |
| 4.265                        | 16.335                   | 16.350                   |
| 4.665                        | 16.328                   | 16.342                   |
| 5.065                        | 16.325                   | 16.348                   |
| 5.465                        | 16.327                   | 16.348                   |
| 5.865                        | 16.344                   | 16.367                   |
| 6.265                        | 16.359                   | 16.412                   |
| 6.465                        | 16.344                   | 16.384                   |
| 6.665                        | 16.260                   | 16.205                   |
| 6.865                        | 16.080                   | 16.080                   |
| 7.065                        | 16.139                   | 16.130                   |
| 7.265                        | 15.882                   | 15.850                   |
| 7.465                        | 15.849                   | 15.807                   |
| 7.665                        | 15.872                   | 15.798                   |
| 7.865                        | 15.887                   | 15.784                   |
| 8.065                        | 16.057                   | 16.073                   |
| 8.265                        | 16.335                   | 16.162                   |
| 8.465                        | 16.170                   | 16.428                   |
| 8.665                        | 16.477                   | 16.504                   |
| 8.865                        | 16.504                   | NA                       |
| 9.065                        | 16.613                   | 16.598                   |
| 9.265                        | 16.694                   | NA                       |
| 9.465                        | 16.718                   | 16.713                   |
| 9.665                        | 16.816                   | NA                       |
| 9.865                        | 16.814                   | 16.842                   |
| 10.065                       | 16.893                   | NA                       |
| 10.265                       | 16.920                   | 16.923                   |

Cross-section 19

| Distance from right bank(m) | Elevation, year 2010 (m) | Elevation, year 2012 (m) |
|-----------------------------|--------------------------|--------------------------|
| 0.265                       | 17.026                   | 17.029                   |
| 0.465                       | 17.029                   | 17.026                   |
| 0.665                       | 16.977                   | 16.977                   |
| 0.865                       | 16.914                   | 16.912                   |
| 1.065                       | 16.848                   | 16.845                   |
| 1.265                       | 16.772                   | 16.761                   |
| 1.465                       | 16.703                   | 16.699                   |
| 1.665                       | 16.623                   | 16.600                   |
| 1.865                       | 16.564                   | 16.547                   |
| 2.065                       | 16.479                   | 16.482                   |
| 2.265                       | 16.411                   | 16.392                   |
| 2.465                       | 16.340                   | 16.338                   |
| 2.665                       | 16.336                   | 16.335                   |
| 3.065                       | 16.333                   | 16.323                   |
| 3.465                       | 16.317                   | 16.307                   |
| 3.865                       | 16.343                   | 16.349                   |
| 4.265                       | 16.361                   | 16.346                   |
| 4.665                       | 16.351                   | 16.362                   |
| 5.065                       | 16.363                   | NA                       |
| 5.465                       | 16.363                   | 16.371                   |
| 5.865                       | 16.372                   | 16.375                   |
| 6.265                       | 16.385                   | 16.388                   |
| 6.465                       | 16.348                   | 16.362                   |
| 6.665                       | 16.313                   | 16.355                   |
| 6.865                       | 16.267                   | 16.383                   |
| 7.065                       | 16.144                   | 16.056                   |
| 7.265                       | 16.022                   | 15.950                   |
| 7.465                       | 15.979                   | 15.865                   |
| 7.665                       | 15.934                   | 15.747                   |
| 7.865                       | 15.788                   | 15.678                   |
| 8.065                       | 15.808                   | 15.679                   |
| 8.265                       | 15.830                   | 15.764                   |
| 8.465                       | 15.902                   | 16.002                   |
| 8.665                       | 16.185                   | 16.226                   |
| 8.865                       | 16.223                   | NA                       |
| 9.065                       | 16.455                   | 16.464                   |
| 9.265                       | 16.534                   | NA                       |
| 9.465                       | 16.700                   | 16.589                   |
| 9.665                       | 16.568                   | NA                       |
| 9.865                       | 16.577                   | 16.594                   |
| 10.065                      | 16.579                   | NA                       |
| 10.265                      | 16.605                   | 16.691                   |

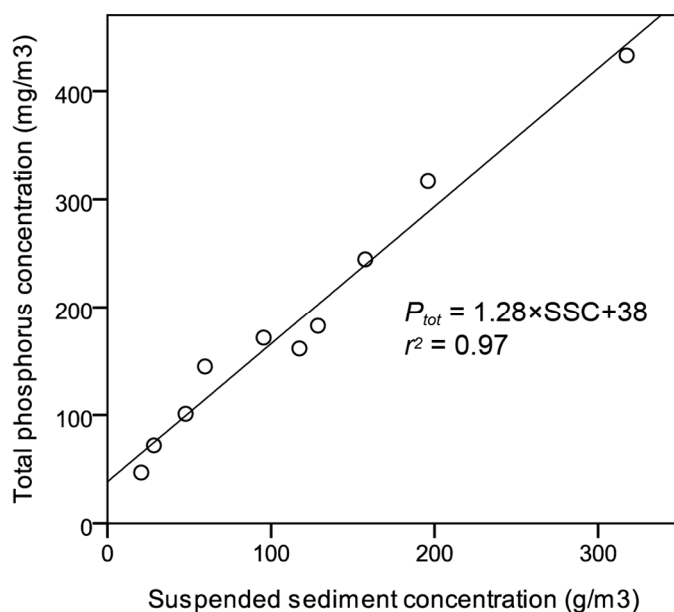

Figure S4 Linear regression between suspended sediment and total phosphorus concentrations at the primary reach-scale pilot site (Ritobäcken, Finland; original source: [38]). The units of the regression equation are ( $\mu g/L$ ) for  $P_{tot}$  and ( $mg/L$ ) for SSC.

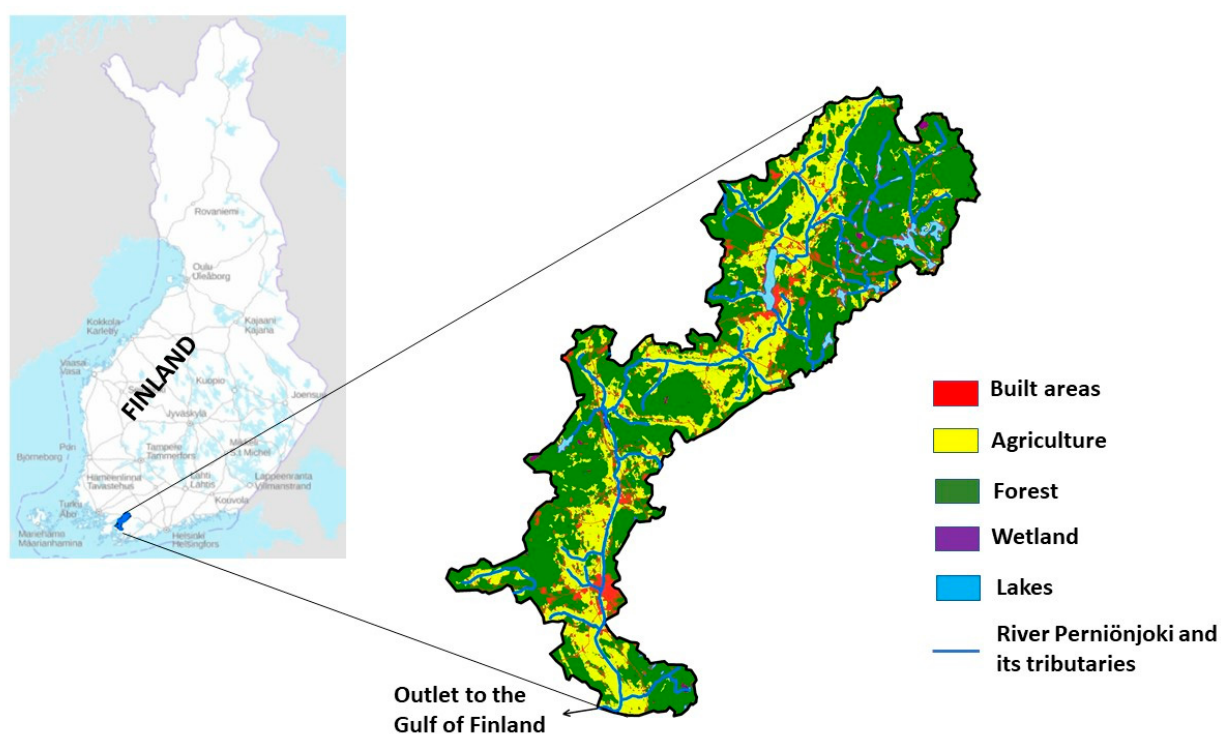

Figure S5 The land use and network of major channels at the catchment-scale pilot site (River Perniönjoki).

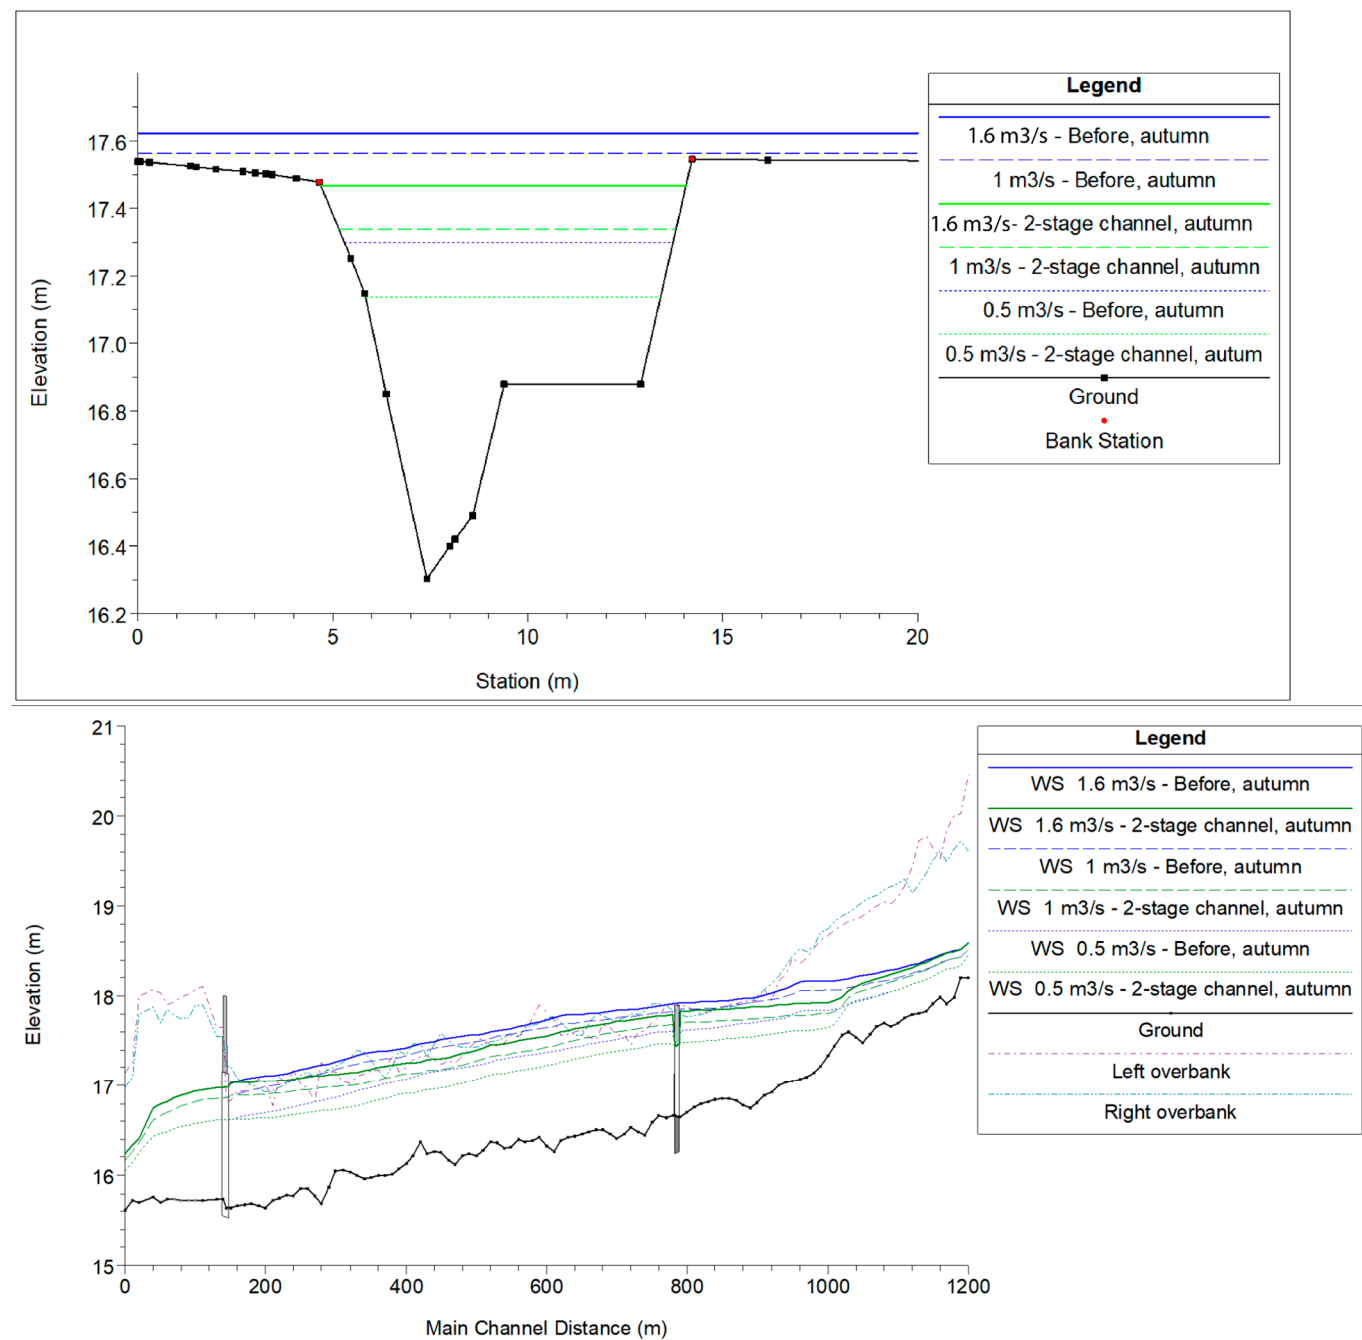

Figure S6 Simulated water levels at selected discharges before and after two-stage channel construction under autumn-summer conditions. 1.6 m³/s represents 1-in-5-year flow. a) A view of a representative cross-section, b) Longitudinal profile.

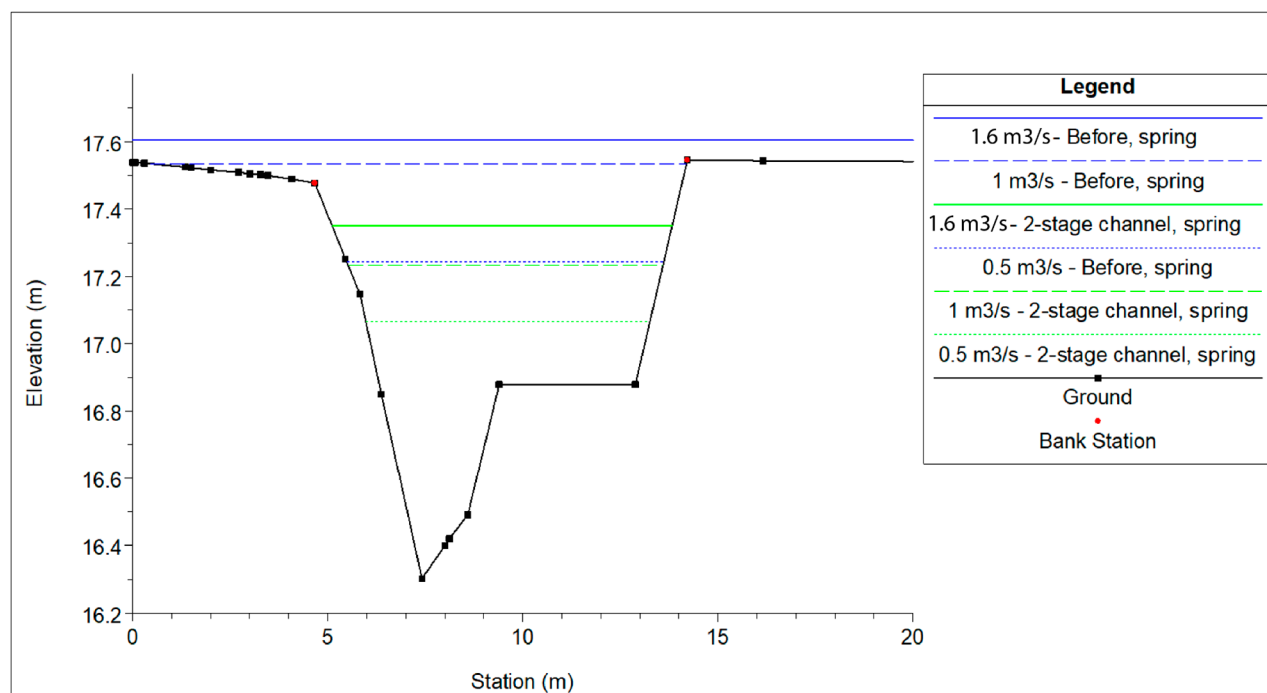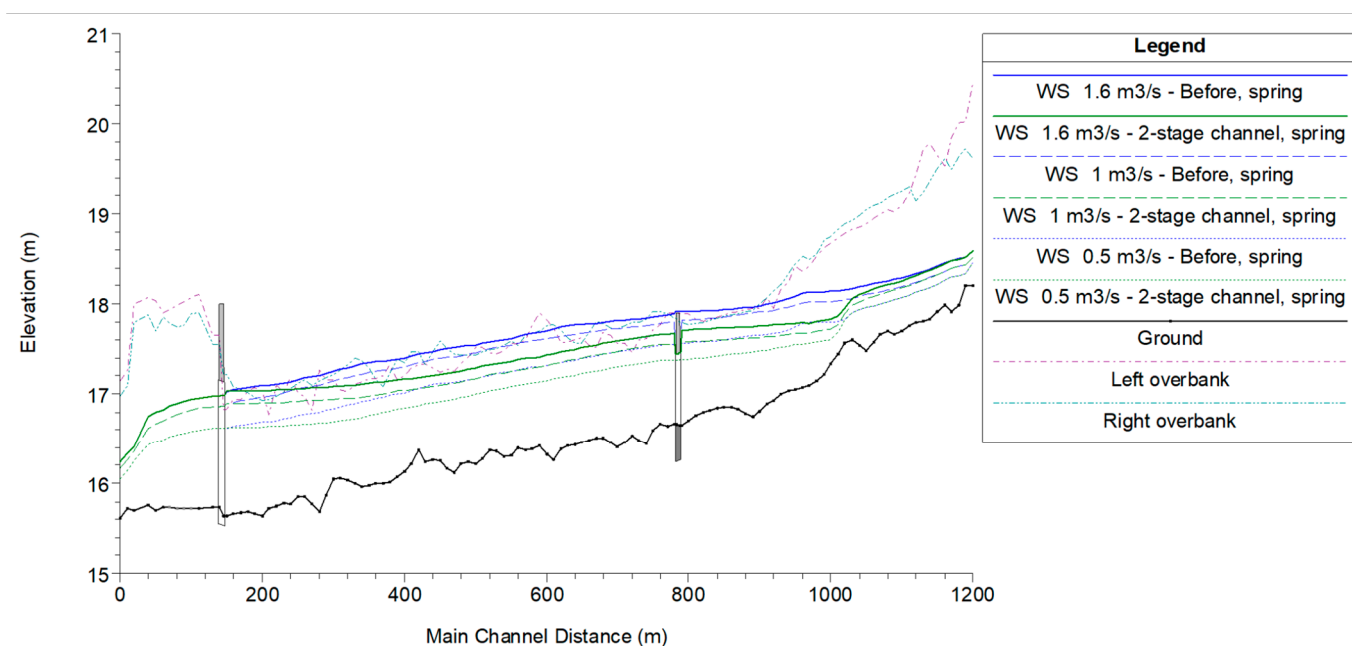

Figure S7 Simulated water levels at selected discharges before and after two-stage channel construction under spring-winter conditions. 1.6 m³/s represents 1-in-5-year flow. a) A view of a representative cross-section, b) Longitudinal profile

**Table S2. Plant species found in the study areas; Ritobäcken (relative frequency, mean and maximum cover) and Immersbybäcken and Häsängsbäcken (relative frequency).**

|                                    | Ritobäcken, two-stage<br>channel, bank |               |              | Ritobäcken, two-stage<br>channel, floodplain |               |              | Ritobäcken,<br>conventionally dredged |               |              | Immersbybä<br>cken,<br>conventio<br>nally dredged | Häsängsb<br>äcken,<br>conventio<br>nally dredged |
|------------------------------------|----------------------------------------|---------------|--------------|----------------------------------------------|---------------|--------------|---------------------------------------|---------------|--------------|---------------------------------------------------|--------------------------------------------------|
|                                    | rel.<br>freq.                          | cover<br>mean | cover<br>max | rel.<br>freq.                                | cover<br>mean | cover<br>max | rel.<br>freq.                         | cover<br>mean | cover<br>max | rel.<br>freq.                                     | rel.<br>freq.                                    |
| <i>Achillea millefolium</i>        | 35                                     | 3             | 10           | 6                                            | 1             | 1            | 32                                    | 1             | 1            | 100                                               | 60                                               |
| <i>Achillea ptarmica</i>           | 56                                     | 2             | 10           | 74                                           | 2             | 6            | 18                                    | 1             | 2            | 100                                               | 40                                               |
| <i>Aegopodium podagraria</i>       | 35                                     | 5             | 20           | 3                                            | 1             | 1            | 100                                   | 13            | 30           | 80                                                | 100                                              |
| <i>Agrostis capillaris</i>         | 18                                     | 1             | 1            | 12                                           | 1             | 1            | 4                                     | 1             | 1            |                                                   | 20                                               |
| <i>Alchemilla</i> sp.              | 6                                      | 1             | 1            |                                              |               |              |                                       |               |              |                                                   |                                                  |
| <i>Alopecurus pratensis</i>        | 88                                     | 12            | 60           | 68                                           | 7             | 30           | 93                                    | 24            | 40           | 100                                               | 80                                               |
| <i>Angelica sylvestris</i>         | 100                                    | 9             | 30           | 68                                           | 2             | 4            | 57                                    | 2             | 6            | 100                                               | 60                                               |
| <i>Anthriscus sylvestris</i>       | 97                                     | 10            | 40           | 15                                           | 2             | 4            | 93                                    | 7             | 10           | 40                                                | 100                                              |
| <i>Artemisia vulgaris</i>          | 74                                     | 3             | 10           |                                              |               |              | 4                                     | 1             | 1            | 100                                               |                                                  |
| <i>Athyrium filix-femina</i>       |                                        |               |              |                                              |               |              | 4                                     | 1             | 1            |                                                   |                                                  |
| <i>Avenula pubescens</i>           | 3                                      | 1             | 1            |                                              |               |              |                                       |               |              |                                                   |                                                  |
| <i>Bidens tripartita</i>           | 3                                      | 1             | 1            |                                              |               |              |                                       |               |              |                                                   |                                                  |
| <i>Calamagrostis canescens</i>     | 53                                     | 9             | 60           | 94                                           | 39            | 90           | 54                                    | 10            | 20           | 80                                                | 40                                               |
| <i>Calamagrostis epigejos</i>      |                                        |               |              |                                              |               |              | 4                                     | 1             | 1            |                                                   |                                                  |
| <i>Calamagrostis phragmitoides</i> | 9                                      | 4             | 6            | 47                                           | 17            | 50           | 11                                    | 6             | 10           |                                                   | 20                                               |
| <i>Caltha palustris</i>            | 3                                      | 1             | 1            | 12                                           | 1             | 1            |                                       |               |              |                                                   |                                                  |
| <i>Campanula patula</i>            |                                        |               |              |                                              |               |              |                                       |               |              | 40                                                |                                                  |
| <i>Capsella bursa-pastoris</i>     |                                        |               |              |                                              |               |              |                                       |               |              |                                                   | 20                                               |
| <i>Cardus crispus</i>              |                                        |               |              |                                              |               |              | 4                                     | 1             | 1            |                                                   |                                                  |
| <i>Carex acuta</i>                 |                                        |               |              | 24                                           | 4             | 10           |                                       |               |              |                                                   |                                                  |
| <i>Carex vesicaria</i>             |                                        |               |              | 3                                            | 1             | 1            |                                       |               |              |                                                   |                                                  |
| <i>Centaurea jacea</i>             | 9                                      | 1             | 1            | 12                                           | 1             | 1            | 4                                     | 2             | 2            | 20                                                |                                                  |
| <i>Chamaenerion angustifolium</i>  | 47                                     | 7             | 30           | 24                                           | 4             | 10           | 29                                    | 10            | 40           | 100                                               | 40                                               |
| <i>Cirsium arvense</i>             | 97                                     | 6             | 25           | 26                                           | 1             | 1            | 93                                    | 4             | 10           | 100                                               | 60                                               |
| <i>Cirsium heterophyllum</i>       | 68                                     | 5             | 15           | 26                                           | 1             | 1            | 14                                    | 2             | 6            |                                                   |                                                  |
| <i>Comarum palustre</i>            |                                        |               |              | 3                                            | 1             | 1            |                                       |               |              |                                                   |                                                  |
| <i>Convolvulus sepium</i>          |                                        |               |              |                                              |               |              |                                       |               |              |                                                   |                                                  |
| <i>Dactylis glomerata</i>          | 3                                      | 1             | 1            |                                              |               |              |                                       |               |              |                                                   |                                                  |
| <i>Deschampsia cespitosa</i>       | 35                                     | 2             | 4            | 56                                           | 1             | 4            | 18                                    | 1             | 2            | 80                                                | 100                                              |
| <i>Elytrigia repens</i>            | 71                                     | 7             | 30           | 21                                           | 1             | 2            | 96                                    | 22            | 60           | 100                                               | 100                                              |
| <i>Epilobium adenocaulon</i>       | 6                                      | 1             | 1            | 6                                            | 1             | 1            |                                       |               |              |                                                   | 40                                               |
| <i>Equisetum arvense</i>           | 9                                      | 3             | 6            | 3                                            | 1             | 1            | 46                                    | 2             | 6            | 40                                                | 60                                               |
| <i>Equisetum fluviatile</i>        |                                        |               |              | 6                                            | 1             | 1            |                                       |               |              |                                                   |                                                  |
| <i>Equisetum palustre</i>          | 47                                     | 2             | 6            | 21                                           | 2             | 6            |                                       |               |              |                                                   |                                                  |
| <i>Equisetum sylvaticum</i>        |                                        |               |              |                                              |               |              | 11                                    | 1             | 2            |                                                   |                                                  |
| <i>Festuca ovina</i> group         | 3                                      | 1             | 1            |                                              |               |              | 11                                    | 2             | 2            | 40                                                | 20                                               |

|                                   |    |    |    |     |    |    |    |   |    |     |     |
|-----------------------------------|----|----|----|-----|----|----|----|---|----|-----|-----|
| <i>Festuca rubra</i> group        |    |    |    |     |    |    | 11 | 1 | 1  |     |     |
| <i>Filipendula ulmaria</i>        | 71 | 11 | 40 | 100 | 20 | 80 | 68 | 4 | 20 | 40  | 20  |
| <i>Galeopsis bifida</i>           | 3  | 1  | 1  | 3   | 1  | 1  | 11 | 1 | 1  |     |     |
| <i>Galeopsis speciosa</i>         | 21 | 1  | 2  | 21  | 2  | 6  | 21 | 1 | 1  | 100 | 100 |
| <i>Galium album</i>               | 97 | 4  | 20 | 53  | 1  | 1  | 7  | 1 | 1  | 100 | 40  |
| <i>Galium boreale</i>             |    |    |    | 12  | 1  | 1  | 18 | 2 | 4  |     |     |
| <i>Galium palustre</i>            |    |    |    | 26  | 1  | 2  |    |   |    |     | 20  |
| <i>Galium spurium</i>             |    |    |    |     |    |    |    |   |    |     | 20  |
| <i>Galium uliginosum</i>          | 3  | 1  | 1  | 9   | 1  | 1  |    |   |    |     |     |
| <i>Geranium sylvaticum</i>        |    |    |    |     |    |    | 4  | 1 | 1  |     |     |
| <i>Gnaphalium uliginosum</i>      |    |    |    |     |    |    |    |   |    |     |     |
| <i>Hieracium umbellatum</i>       | 15 | 1  | 1  | 3   | 1  | 1  | 4  | 2 | 2  | 20  |     |
| <i>Hypericum maculatum</i>        | 24 | 1  | 1  | 3   | 1  | 1  | 11 | 1 | 2  | 80  |     |
| <i>Iris pseudacorus</i>           |    |    |    | 21  | 1  | 2  |    |   |    |     |     |
| <i>Juncus effusus</i>             | 3  | 1  | 1  | 18  | 2  | 2  |    |   |    |     | 60  |
| <i>Juncus filiformis</i>          |    |    |    | 3   | 1  | 1  |    |   |    |     |     |
| <i>Lamium</i> sp                  |    |    |    |     |    |    |    |   |    |     | 20  |
| <i>Lapsana communis</i>           | 9  | 1  | 1  |     |    |    | 29 | 1 | 1  | 40  | 80  |
| <i>Lathyrus pratensis</i>         | 50 | 3  | 15 | 68  | 2  | 10 | 32 | 1 | 2  |     |     |
| <i>Leontodon autumnalis</i>       |    |    |    |     |    |    |    |   |    |     | 20  |
| <i>Linaria vulgaris</i>           | 53 | 1  | 4  | 15  | 1  | 1  | 7  | 2 | 2  | 20  | 20  |
| <i>Lolium multiflorum</i>         | 6  | 1  | 1  |     |    |    |    |   |    |     | 40  |
| <i>Lupinus polyphyllus</i>        | 26 | 4  | 8  | 21  | 2  | 6  |    |   |    |     |     |
| <i>Lychnis flos-cuculi</i>        | 9  | 1  | 1  | 41  | 1  | 1  | 4  | 1 | 1  |     |     |
| <i>Lysimachia vulgaris</i>        | 35 | 1  | 2  | 97  | 9  | 40 | 86 | 2 | 10 | 100 | 100 |
| <i>Lythrum salicaria</i>          |    |    |    | 32  | 2  | 4  |    |   |    |     |     |
| <i>Mentha arvensis</i>            | 3  | 1  | 1  |     |    |    |    |   |    |     | 20  |
| <i>Myosotis arvensis</i>          | 3  | 1  | 1  |     |    |    | 7  | 1 | 1  |     | 20  |
| <i>Myosotis laxa</i>              |    |    |    | 24  | 1  | 1  |    |   |    |     | 40  |
| <i>Myosotis scorpioides</i>       | 3  | 1  | 1  | 9   | 1  | 1  |    |   |    |     |     |
| <i>Persicaria amphibia</i>        | 32 | 2  | 4  | 26  | 2  | 4  |    |   |    |     | 60  |
| <i>Peucedanum palustre</i>        | 3  | 1  | 1  | 15  | 2  | 4  | 4  | 1 | 1  | 20  |     |
| <i>Phalaris arundinacea</i>       |    |    |    |     |    |    |    |   |    | 80  |     |
| <i>Phleum pratense</i>            | 88 | 13 | 30 | 12  | 3  | 6  | 21 | 5 | 15 | 20  | 20  |
| <i>Pilosella</i> sp.              |    |    |    |     |    |    |    |   |    | 20  |     |
| <i>Poa palustris</i>              | 76 | 3  | 10 | 68  | 3  | 20 | 43 | 1 | 4  | 20  | 100 |
| <i>Poa pratensis</i> group        | 32 | 1  | 2  | 3   | 1  | 1  | 57 | 1 | 2  | 40  |     |
| <i>Poa trivialis</i>              | 3  | 1  | 1  |     |    |    | 6  | 1 | 1  |     |     |
| <i>Ranunculus acris</i>           |    |    |    |     |    |    | 4  | 1 | 1  |     |     |
| <i>Ranunculus repens</i>          | 56 | 1  | 4  | 29  | 1  | 1  | 57 | 1 | 2  | 100 | 100 |
| <i>Rubus idaeus</i>               | 35 | 3  | 6  |     |    |    | 25 | 1 | 2  | 60  | 40  |
| <i>Rumex longifolius</i>          |    |    |    | 3   | 1  | 1  |    |   |    |     |     |
| <i>Rumex thyrsiflora</i>          |    |    |    |     |    |    |    |   |    | 20  |     |
| <i>Schedonorus pratensis</i>      | 38 | 2  | 4  |     |    |    | 11 | 1 | 1  | 40  |     |
| <i>Scirpus sylvaticus</i>         | 26 | 1  | 2  | 59  | 1  | 4  | 43 | 1 | 2  | 40  | 100 |
| <i>Scorzoneroideis autumnalis</i> |    |    |    |     |    |    |    |   |    |     |     |

|                                  |    |   |    |    |   |    |    |   |    |     |     |
|----------------------------------|----|---|----|----|---|----|----|---|----|-----|-----|
| <i>Scutellaria galericulata</i>  |    |   |    | 12 | 1 | 1  | 7  | 1 | 1  |     |     |
| <i>Senecio viscosus</i>          |    |   |    |    |   |    |    |   |    | 20  |     |
| <i>Silene dioica</i>             | 3  | 1 | 1  |    |   |    |    |   |    |     |     |
| <i>Solidago virgaurea</i>        | 15 | 1 | 1  |    |   |    |    |   |    | 20  |     |
| <i>Sonchus arvensis</i>          | 15 | 1 | 1  |    |   |    | 4  | 1 | 1  | 20  | 80  |
| <i>Spergula arvensis</i>         |    |   |    |    |   |    |    |   |    |     | 40  |
| <i>Stachys palustris</i>         |    |   |    | 3  | 1 | 1  |    |   |    |     | 40  |
| <i>Stellaria graminea</i>        | 15 | 1 | 1  | 12 | 1 | 1  |    |   |    | 20  |     |
| <i>Stellaria media</i>           |    |   |    |    |   |    |    |   |    |     | 80  |
| <i>Stellaria sp.</i>             |    |   |    |    |   |    |    |   |    | 60  | 20  |
| <i>Taraxacum sp.</i>             | 35 | 1 | 2  |    |   |    | 7  | 1 | 1  | 100 | 80  |
| <i>Trifolium hybridum</i>        | 18 | 1 | 1  | 12 | 1 | 1  |    |   |    |     |     |
| <i>Trifolium medium</i>          | 44 | 3 | 10 | 44 | 1 | 4  | 75 | 4 | 10 |     |     |
| <i>Trifolium pratense</i>        | 29 | 2 | 10 |    |   |    |    |   |    |     |     |
| <i>Tripleurospermum inodorum</i> | 18 | 1 | 2  | 3  | 1 | 1  |    |   |    |     | 100 |
| <i>Tussilago farfara</i>         | 18 | 4 | 10 | 3  | 2 | 2  | 43 | 8 | 30 |     |     |
| <i>Typha latifolia</i>           |    |   |    |    |   |    |    |   |    | 20  | 20  |
| <i>Urtica dioica</i>             | 59 | 6 | 30 | 47 | 2 | 6  | 68 | 9 | 50 | 60  | 40  |
| <i>Valeriana officinalis</i>     | 21 | 2 | 4  | 50 | 2 | 6  |    |   |    |     |     |
| <i>Veronica chamaedrys</i>       | 12 | 1 | 1  |    |   |    |    |   |    |     |     |
| <i>Veronica officinalis</i>      | 3  | 1 | 1  | 6  | 1 | 1  |    |   |    |     |     |
| <i>Vicia cracca</i>              | 88 | 2 | 10 | 94 | 2 | 10 | 32 | 1 | 1  | 40  | 20  |

Table S3. Number of plant species in the two-stage bank and floodplain and conventionally dredged 20 m long plots.

| Channel part                    | Mean  | Standard error | Minimum | Maximum |
|---------------------------------|-------|----------------|---------|---------|
| Bank of two-stage channel       | 21.85 | 4.09           | 19      | 29      |
| Floodplain of two-stage channel | 17.03 | 4.57           | 13      | 25      |
| Conventionally dredged channel  | 16.14 | 3.77           | 14      | 24      |

### S3 Plant biodiversity results at reach-scale pilot site

Altogether, 101 species were recorded in the study areas (Table S2). The vegetation in the Ritobäckén ditch banks is dominated by common graminoids, such as *Elytrigia repens*, *Alopecurus pratensis* and *Calamagrostis canescens*, and by flowering herbs, such as *Chamaenerion angustifolium*, *Filipendula ulmaria* and *Cirsium arvense*, all growing clonally, rather tall and ‘weedy’ and common in various agricultural areas. Some smaller copiously flowering herbs, such as *Trifolium medium*, *Vicia cracca*, *Lathyrus pratensis* and *Galium album*, were common but sparse. Since the studied areas are not mown, annual species were lacking. The overall species richness compares well with studies of meadows in Estonia (40 species, [89]), ditch banks in the Netherlands (50 species, [90]) or 2-stage banks and floodplains in England (48 species, [91]).

Species found only in the two-stage channel area, floodplain or bank included some with high relative frequency (*Lythrum salicaria*: relative frequency 32; *Carex acuta*: 24; *Iris pseudacorus* 21; *Valeriana officinalis* 50; *Equisetum palustre*: 47; *Veronica chamaedrys*: 12). The most frequent species found only in the two-stage channel sections, in addition to the ones mentioned above, were forbs (*Galium palustre*, relative frequency 26; *Myosotis laxa*, 24; *Persicaria amphibia*, 26; *Juncus effesus*, 18; and *Stellaria graminea*, 15). Species found only or mainly in the two-

stage sections are primarily herbs of wet meadows or riparian areas not usually found in agricultural ditch banks in Finland [92]. The studied area in the conventionally dredged ditch went down to the water edge, but only a few wet meadow species were found, such as *Lysimachia vulgaris*, *Calamagrostis canescens* and *Scirpus sylvaticus*, and these were also common in the two-stage channel area. The results are less representative for Hålsängsbäcken and Immersbybäcken because of the notably smaller number of study plots (see Section 2.2.2).

Table S4. Number of species, Shannon's diversity index and Simpson's evenness of the plant species.

| Indicator                          | Conventionally dredged channel | Floodplain of two-stage channel | Bank of two-stage channel |
|------------------------------------|--------------------------------|---------------------------------|---------------------------|
| Number of species ( $R$ )          | 54                             | 62                              | 68                        |
| Shannon's diversity index ( $H'$ ) | 3.51                           | 3.63                            | 3.84                      |
| Simpsons evenness ( $E$ )          | 0.43                           | 0.37                            | 0.52                      |

#### S4 Pollinator results at reach-scale pilot site

A total of 1083 pollinator individuals and 48 species were recorded in the transect counts along the two-stage reach and the conventionally dredged reach (Table S5). The material included 20 species of butterflies, 15 species of day-active moths and 12 species of bumblebees, as well as the honeybee (*Apis mellifera*) and a small number of solitary bees that could not be identified to species in the field. The total numbers of individuals and species recorded were very similar in the two kinds of reaches (Table S6).

No significant differences were found between the two kinds of reaches in terms of the average species numbers and abundances of different pollinator species groups based on  $2 \times 8$  replicates of 50 m transects and one-way ANOVA. However, the average number of flowering nectar plant species groups was significantly higher in the two-stage reach than in the conventional reach (Table S7). Most pollinator variables did not correlate significantly with the number of flowering nectar plant species groups, with the exception of bumblebees.

We further evaluated the role of the floodplain in determining the occurrence of pollinators by testing the difference in pollinator species richness and abundance between the floodplain and the adjoining buffer strip. All pollinator variables showed a tendency towards more pollinators in the buffer strip (drier habitat) than in the floodplain (wetter habitat; Table S8). This difference was statistically significant for the average total species richness of pollinators, as well as for the average abundances of day-active moths, bumblebees, all pollinators (combined) and the honeybee based on paired t-tests (Table S8). The average flowering nectar plant richness did not differ between the floodplain and the buffer strip, but the coverage of flowering nectar plants was much higher in the buffer strip than in the floodplain ( $p < 0.001$ ; Table S8).

Table S5. Summary of observed pollinator species and their abundances during the five replicated pollinator counts along the Ritobäcken two-stage channel and the near conventionally dredged channel.

| Species                                 | Two-stage channel (field margin) | Two-stage channel (floodplain) | Two-stage channel (field margin + floodplain) | Conventional channel | Total (two-stage + conventional channel) |
|-----------------------------------------|----------------------------------|--------------------------------|-----------------------------------------------|----------------------|------------------------------------------|
| <b>Honeybee</b> , <i>Apis mellifera</i> | 125                              | 15                             | 140                                           | 67                   | 207                                      |
| <b>Solitary bees</b>                    | 9                                | 4                              | 13                                            | 5                    | 18                                       |
| <b>Bumblebees</b>                       |                                  |                                |                                               |                      |                                          |
| <i>Bombus lucorum</i>                   | 55                               | 20                             | 75                                            | 41                   | 116                                      |

|                                 |    |    |    |    |     |
|---------------------------------|----|----|----|----|-----|
| <i>Bombus pascuorum</i>         | 9  | 7  | 16 | 33 | 49  |
| <i>Bombus pratorum</i>          | 5  | 1  | 6  | 16 | 22  |
| <i>Bombus lapidarius</i>        | 7  | 5  | 12 | 2  | 14  |
| <i>Bombus hortorum</i>          | 2  | 10 | 12 | 2  | 14  |
| <i>Bombus veteranus</i>         | 2  | 3  | 5  | 2  | 7   |
| <i>Bombus hypnorum</i>          | 3  | 1  | 4  | 2  | 6   |
| <i>Bombus soroeensis</i>        | 3  | 0  | 3  | 1  | 4   |
| <i>Bombus terrestris</i>        | 1  | 0  | 1  | 2  | 3   |
| <i>Bombus rudarius</i>          | 1  | 0  | 1  | 1  | 2   |
| <i>Bombus subterraneus</i>      | 0  | 0  | 0  | 1  | 1   |
| <i>Bombus bohemicus</i>         | 1  | 0  | 1  | 0  | 1   |
| <b>Butterflies</b>              |    |    |    |    |     |
| <i>Aphantopus hyperantus</i>    | 29 | 13 | 42 | 61 | 103 |
| <i>Thymelicus lineola</i>       | 21 | 10 | 31 | 66 | 97  |
| <i>Brenthis ino</i>             | 10 | 14 | 24 | 32 | 56  |
| <i>Nymphalis urticae</i>        | 20 | 7  | 27 | 19 | 46  |
| <i>Gonepteryx rhamni</i>        | 3  | 7  | 10 | 3  | 13  |
| <i>Argynnis adippe</i>          | 1  | 5  | 6  | 6  | 12  |
| <i>Polyommatus semiargus</i>    | 2  | 0  | 2  | 8  | 10  |
| <i>Coenonympha glycerion</i>    | 0  | 0  | 0  | 9  | 9   |
| <i>Pieris napi</i>              | 1  | 3  | 4  | 1  | 5   |
| <i>Ochlodes sylvanus</i>        | 0  | 1  | 1  | 3  | 4   |
| <i>Polygonia c-album</i>        | 1  | 0  | 1  | 1  | 2   |
| <i>Leptidea juvernica</i>       | 0  | 1  | 1  | 0  | 1   |
| <i>Aporia crataegi</i>          | 0  | 0  | 0  | 1  | 1   |
| <i>Polyommatus amandus</i>      | 1  | 0  | 1  | 0  | 1   |
| <i>Lycaena hippothoe</i>        | 1  | 0  | 1  | 0  | 1   |
| <i>Vanessa atalanta</i>         | 0  | 0  | 0  | 1  | 1   |
| <i>Apatura ilia</i>             | 1  | 0  | 1  | 0  | 1   |
| <i>Plebejus argus</i>           | 0  | 0  | 0  | 1  | 1   |
| <i>Nymphalis io</i>             | 0  | 0  | 0  | 1  | 1   |
| <i>Argynnis paphia</i>          | 1  | 0  | 1  | 0  | 1   |
| <b>Diurnal moths</b>            |    |    |    |    |     |
| <i>Scotopteryx chenopodiata</i> | 30 | 14 | 44 | 53 | 97  |
| <i>Odezia atrata</i>            | 17 | 6  | 23 | 57 | 80  |
| <i>Polypogon tentacularius</i>  | 8  | 5  | 13 | 20 | 33  |
| <i>Idaea serpentata</i>         | 0  | 1  | 1  | 8  | 9   |
| <i>Xanthorhoe montanata</i>     | 3  | 0  | 3  | 5  | 8   |
| <i>Scopula immorata</i>         | 1  | 0  | 1  | 5  | 6   |
| <i>Scopula immutata</i>         | 1  | 2  | 3  | 3  | 6   |
| <i>Epirrhoe alternata</i>       | 4  | 0  | 4  | 0  | 4   |
| <i>Semiothisa clathrata</i>     | 1  | 1  | 2  | 1  | 3   |
| <i>Siona lineata</i>            | 0  | 0  | 0  | 2  | 2   |
| <i>Idaea pallidata</i>          | 0  | 1  | 1  | 0  | 1   |
| <i>Euclidia glyphica</i>        | 1  | 0  | 1  | 0  | 1   |
| <i>Itame brunneata</i>          | 0  | 0  | 0  | 1  | 1   |

|                           |     |     |     |     |      |
|---------------------------|-----|-----|-----|-----|------|
| <i>Autographa chrysis</i> | 1   | 0   | 1   | 0   | 1    |
| <i>Cabera pusaria</i>     | 0   | 1   | 1   | 0   | 1    |
| Total                     | 382 | 158 | 540 | 543 | 1083 |

Table S6. Summary of total observations in the pollinator counts.

| Pollinator group                        | Floodplain  |         | Buffer strip |         | Two-stage reach |         | Conventional reach |         | Total       |         |
|-----------------------------------------|-------------|---------|--------------|---------|-----------------|---------|--------------------|---------|-------------|---------|
|                                         | Individuals | Species | Individuals  | Species | Individuals     | Species | Individuals        | Species | Individuals | Species |
| Butterflies                             | 61          | 9       | 92           | 13      | 153             | 15      | 213                | 15      | 366         | 20      |
| Day-active moths                        | 31          | 8       | 67           | 10      | 98              | 13      | 155                | 10      | 253         | 15      |
| Bumblebees                              | 47          | 7       | 89           | 11      | 136             | 11      | 103                | 11      | 239         | 12      |
| Solitary bees                           | 4           | -       | 9            | -       | 13              | -       | 5                  | -       | 18          | -       |
| Honey bee                               | 15          | -       | 125          | -       | 140             | -       | 67                 | -       | 207         | -       |
| All pollinators (without the honey bee) | 143         | 25      | 257          | 35      | 400             | 40      | 476                | 37      | 876         | 48      |
| All together                            | 158         | 26      | 382          | 36      | 540             | 41      | 543                | 38      | 1083        | 49      |

Table S7. Comparison of pollinator results from the Ritobäcken two-stage reach and the nearby conventionally dredged reach. The pollinator mean values are based on combining five replicated counts on eight separate 50-m transects along the two types of reaches. The difference in means between the two types of habitat was tested using one-way anova. Significance: \*  $P < 0.05$ , \*\*  $P < 0.01$ , \*\*\*  $P < 0.001$

| Pollinator group                        | Number of species                         |     |                    |     |           | Number of individuals |      |                    |      |           |
|-----------------------------------------|-------------------------------------------|-----|--------------------|-----|-----------|-----------------------|------|--------------------|------|-----------|
|                                         | Two-stage reach                           |     | Conventional reach |     | Signific. | Two-stage reach       |      | Conventional reach |      | Signific. |
|                                         | mean                                      | SD  | mean               | SD  |           | mean                  | SD   | mean               | SD   |           |
| Butterflies                             | 6.3                                       | 1.3 | 6.4                | 1.2 | ns        | 19.1                  | 6.9  | 26.6               | 7.2  | ns        |
| Day-active moths                        | 4.8                                       | 0.9 | 4.8                | 1.3 | ns        | 12.3                  | 3.1  | 19.4               | 11.3 | ns        |
| Bumblebees                              | 5.1                                       | 2.0 | 3.6                | 1.7 | ns        | 17.0                  | 10.7 | 12.9               | 9.8  | ns        |
| Solitary bees                           | -                                         | -   | -                  | -   |           | 1.6                   | 2.2  | 0.6                | 1.1  | ns        |
| Honey bee                               | -                                         | -   | -                  | -   |           | 17.5                  | 6.0  | 8.4                | 8.0  | *         |
| All pollinators (without the honey bee) | 16.1                                      | 3.0 | 14.8               | 3.2 | ns        | 50.0                  | 18.5 | 59.5               | 23.4 | ns        |
|                                         | Number of flowering nectar species groups |     |                    |     |           |                       |      |                    |      |           |
|                                         | 16.0                                      | 1.4 | 11.4               | 1.8 | ***       |                       |      |                    |      |           |

**Table S8.** Comparison of pollinator results from the floodplain and the adjoining buffer strip of the Ritobäcken two-stage reach. The pollinator mean values were obtained by combining five replicated counts on eight separate 50 m transects along the two-stage reach. The difference in means between the two types of habitat was tested using the paired *t*-test. Significance: \*  $P < 0.05$ , \*\*  $P < 0.01$ , \*\*\*  $P < 0.001$

| Pollinator group                        | Number of species                         |     |              |     |            | Signific. | Number of individuals                           |      |      |      |     | Signific. |
|-----------------------------------------|-------------------------------------------|-----|--------------|-----|------------|-----------|-------------------------------------------------|------|------|------|-----|-----------|
|                                         | Floodplain                                |     | Buffer strip |     | Floodplain |           | Buffer strip                                    |      |      |      |     |           |
|                                         | mean                                      | SD  | mean         | SD  | mean       |           | SD                                              | mean | SD   |      |     |           |
| Butterflies                             | 4.1                                       | 1.5 | 5.1          | 1.2 | ns         | 7.6       | 4.6                                             | 11.5 | 4.6  | ns   |     |           |
| Day-active moths                        | 2.1                                       | 1.1 | 3.6          | 1.2 | ns         | 3.9       | 1.9                                             | 8.4  | 3.9  | *    |     |           |
| Bumblebees                              | 2.9                                       | 1.6 | 4.0          | 1.7 | ns         | 5.9       | 4.6                                             | 11.1 | 7.2  | *    |     |           |
| Solitary bees                           | -                                         |     | -            |     |            | 0.5       | 0.8                                             | 1.1  | 1.6  | ns   |     |           |
| Honey bee                               | -                                         |     | -            |     |            | 1.9       | 2.3                                             | 15.6 | 4.7  | ***  |     |           |
| All pollinators (without the honey bee) | 9.1                                       | 3.0 | 12.8         | 2.6 | *          | 17.9      | 8.4                                             | 32.1 | 11.7 | **   |     |           |
|                                         | Number of flowering nectar species groups |     |              |     |            |           | Coverage of flowering nectar species groups (%) |      |      |      |     |           |
|                                         | 11.6                                      | 1.7 | 13.4         | 1.6 | ns         |           | 17.4                                            | 8.3  | 49.9 | 14.6 | *** |           |

**Table S9.** Construction costs, value of lost fields and value of lost crops at the reach-scale TSC pilot sites.

| Pilot Site         | Excavated soil volume (m <sup>3</sup> ) | Lost field area (ha) | Lost field area per channel length (m <sup>2</sup> /m) | Unit construction cost per channel length (€/m) | Unit construction cost per excavated soil volume (€/m <sup>3</sup> ) | Construction cost ratio <sup>1</sup> | Value of lost field per channel length (€/m) | Value of lost crops per channel length (€/yr/m) | Sources of financing for construction <sup>2</sup> |
|--------------------|-----------------------------------------|----------------------|--------------------------------------------------------|-------------------------------------------------|----------------------------------------------------------------------|--------------------------------------|----------------------------------------------|-------------------------------------------------|----------------------------------------------------|
| Ritobäcken         | 2 000                                   | 0.33                 | 4.0                                                    | 18                                              | 7.5                                                                  | 3.7                                  | 3.8                                          | 0.28                                            | ELY 100%                                           |
| Kaukan-<br>aranoja | 2 600                                   | 0.26                 | 3.8                                                    | 11                                              | 3.0                                                                  | 2.3                                  | 4.3                                          | 0.26                                            | no data                                            |
| Luvalahden-<br>oja | 1 700                                   | 0.17                 | 3.8                                                    | 14                                              | 3.8                                                                  | 2.9                                  | 4.3                                          | 0.25                                            | no data                                            |
| Hardom-<br>bäcken  | 1 400                                   | 0.08                 | 2.6                                                    | 23                                              | 4.8                                                                  | 4.6                                  | 2.4                                          | 0.17                                            | Pr 90%, Ow 10%                                     |
| Uuhikon-<br>oja    | 9 800                                   | 0.94                 | 4.0                                                    | 35                                              | 8.4                                                                  | 4.3                                  | 3.6                                          | 0.27                                            | ELY 48%, Pr 36%, Ow 16%                            |
| Leppioja           | 7 100                                   | 0.40                 | 4.0                                                    | 25                                              | 3.5                                                                  | 4.9                                  | 3.1                                          | 0.28                                            | no data                                            |
| <b>Mean</b>        | <b>4100</b>                             | <b>0.36</b>          | <b>3.7</b>                                             | <b>21</b>                                       | <b>5.2</b>                                                           | <b>3.8</b>                           | <b>3.6</b>                                   | <b>0.25</b>                                     | <b>ELY 49%, Pr 42%, Ow 9%</b>                      |

<sup>1</sup> Depicts how many times more expensive the two-stage channel is to construct compared to one-time conventional maintenance dredging

<sup>2</sup> ELY = Regional State Authority, Pr = Externally funded project, Ow = Land owners

## References cited in the Supplementary Material

88. Huttunen, I.; Huttunen, M.; Piirainen, V.; Korppoo, M.; Lepistö, A.; Räike, A.; Tattari, S.; Vehviläinen, B. A national scale nutrient loading model for Finnish watersheds—VEMALA. *Environ. Model. Assess.* **2016**, *21*, 83–109, doi:10.1007/s10666-015-9470-6.

89. Riibak, K.; Bennett, J.A.; Kook, E.; Reier, Ü.; Tamme, R.; Bueno, C.G.; Pärtel, M. Drivers of plant community completeness differ at regional and landscape scales. *Agric. Ecosyst. Environ.* **2020**, *301*, 107004.
90. Manhoudt, A.G.E.; de Haes, H.A.U.; de Snoo, G.R. An indicator of plant species richness of semi-natural habitats and crops on arable farms. *Agric. Ecosyst. Environ.* **2005**, *109*, 166–174.
91. Raven, J.P. Vegetation changes within the flood relief stage of two-stage channels excavated along a small rural clay river. *J. Appl. Ecol.* **1986**, *23*, 1001–1011.
92. Tarmi, S.; Tuuri, H.; Helenius, J. Plant communities of field boundaries in Finnish farmland. *Agric. Food Sci.* **2002**, *11*, 121–135.
